# Supplementary material
Source: bioRxiv or medRxiv preprint supplement (http://medrxiv.stage.highwire.org/highwire/filestream/78191/field_highwire_adjunct_files/0/2020.04.23.20074310-1.pdf)

## NYC COVID-19 Residency Survey

1.

\* 1. What is your Residency Training Program?

- |                                                 |                                                            |
|-------------------------------------------------|------------------------------------------------------------|
| <input type="radio"/> Anesthesiology            | <input type="radio"/> Oral/Maxillofacial Surgery           |
| <input type="radio"/> Dermatology               | <input type="radio"/> Orthopedic Surgery                   |
| <input type="radio"/> Diagnostic Radiology      | <input type="radio"/> Otolaryngology                       |
| <input type="radio"/> Emergency Medicine        | <input type="radio"/> Pathology                            |
| <input type="radio"/> Family Medicine           | <input type="radio"/> Pediatrics                           |
| <input type="radio"/> General Surgery           | <input type="radio"/> Physical Medicine and Rehabilitation |
| <input type="radio"/> Internal Medicine         | <input type="radio"/> Plastic Surgery                      |
| <input type="radio"/> Interventional Radiology  | <input type="radio"/> Preventive Medicine                  |
| <input type="radio"/> Medical Genetics          | <input type="radio"/> Psychiatry                           |
| <input type="radio"/> Neurological Surgery      | <input type="radio"/> Radiation Oncology                   |
| <input type="radio"/> Neurology                 | <input type="radio"/> Radiology                            |
| <input type="radio"/> Nuclear Medicine          | <input type="radio"/> Urology                              |
| <input type="radio"/> Obstetrics and Gynecology | <input type="radio"/> Vascular Surgery                     |
| <input type="radio"/> Ophthalmology             |                                                            |
| <input type="radio"/> Other (please specify)    |                                                            |

\* 2. How many hospitals do your residents cover?

- |                         |                          |
|-------------------------|--------------------------|
| <input type="radio"/> 1 | <input type="radio"/> 4  |
| <input type="radio"/> 2 | <input type="radio"/> 5  |
| <input type="radio"/> 3 | <input type="radio"/> >5 |

\* 3. How many total residents are there currently in your program (all years combined)? (E.g. 5 per year in 3 year program, but 1 quit, so 14 in total)

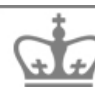

\* 4. Do residents in your department **currently** wear masks for all patient encounters?

- ☐ Yes
- ☐ No
- ☐ Only when evaluating a PUI or known COVID-19 patient
- ☐ Depends on the hospital and available supplies

Other (please specify)

\* 5. If your residents wear masks for all patient encounters, approximately when was this practice implemented?

- |                                             |                                  |
|---------------------------------------------|----------------------------------|
| <input type="radio"/> 3/2 - 3/8 or previous | <input type="radio"/> 3/30 - 4/5 |
| <input type="radio"/> 3/9 - 3/15            | <input type="radio"/> Other      |
| <input type="radio"/> 3/16 - 3/22           | <input type="radio"/> N/A        |
| <input type="radio"/> 3/23 - 3/29           |                                  |

\* 6. If residents wear masks for all patient encounters, what kind of masks do they use?

- ☐ Surgical Mask
- ☐ N95
- ☐ Both, depending on context
- ☐ Other

Other (please specify)

\* 7. How are residents using masks?

- ☐ Single use
- ☐ Extended use (wearing the same mask for repeated close contact encounters with several patients, without removing between patient encounters)
- ☐ Reuse (using the same mask for multiple encounters with patients but removing it ('doffing') after each encounter)
- ☐ Both Extended and Reuse

Other (please specify)

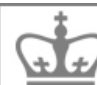

\* 8. How many residents have been tested for SARS-CoV-2? How many are still waiting for a test? (Put in N/A if you don't have the data)

Number of residents tested

Number of residents  
waiting for a test or cannot  
get a test

## NYC COVID-19 Residency Survey

2.

\* 9. Have any residents tested positive for SARS-CoV-2?

☐ Yes

☐ No

## NYC COVID-19 Residency Survey

### 3. SARS-CoV-2 Positive Residents

\* 10. How many residents have had a **positive SARS-CoV-2 Test**?

\* 11. Of these confirmed **SARS-CoV-2 positive residents**, what kind of test was used?

☐ Nasal Swab

☐ Don't know

☐ Oropharyngeal Swab

☐ N/A

☐ Bronchoalveolar Lavage

Other (please specify)

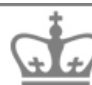

- \* 12. Of these confirmed **SARS-CoV-2 positive residents**, what specific week were they diagnosed? (Please put N/A if you don't have this information)

|                            |                      |
|----------------------------|----------------------|
| Number diagnosed 3/2-3/8   | <input type="text"/> |
| Number diagnosed 3/9-3/15  | <input type="text"/> |
| Number diagnosed 3/16-3/22 | <input type="text"/> |
| Number diagnosed 3/23-3/29 | <input type="text"/> |
| Number diagnosed 3/30-4/5  | <input type="text"/> |
| Other                      | <input type="text"/> |

- \* 13. Of these confirmed **SARS-CoV-2 positive residents**, how long were they quarantined, if at all? (Please put N/A if you don't have this information)

|                                            |                      |
|--------------------------------------------|----------------------|
| Number of residents not quarantined at all | <input type="text"/> |
| Number of residents quarantined 1-7 days   | <input type="text"/> |
| Number of residents quarantined 8-14 days  | <input type="text"/> |
| Number of residents quarantined 15-21 days | <input type="text"/> |
| Number of residents quarantined >21 days   | <input type="text"/> |

- \* 14. Of these confirmed **SARS-CoV-2 positive residents**, how many went to a doctor (PCP, urgent care) for their symptoms? (do not include residents who were only tested but did not have a medical evaluation)

**For these next 5 questions, one resident may fall into multiple categories**

- \* 15. Of these confirmed **SARS-CoV-2 positive residents**, how many went to the emergency room for their symptoms?

- \* 16. Of these confirmed **SARS-CoV-2 positive residents**, how many were hospitalized for their symptoms?

- \* 17. Of these confirmed **SARS-CoV-2 positive residents**, how many were specifically admitted to the ICU or for critical management?

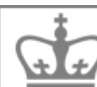

\* 18. Of these confirmed **SARS-CoV-2 positive residents**, how many have died?

## NYC COVID-19 Residency Survey

4.

\* 19. Do you have residents who have been **presumed SARS-CoV-2 positive (based on symptoms: sore throat, cough, fever, shortness of breath, chest pain, myalgias, malaise, conjunctivitis, loss of smell, GI symptoms) without any testing?**

☐ Yes

☐ No

## NYC COVID-19 Residency Survey

### 5. Residents Presumed SARS-CoV-2 Positive \*Without\* Testing

\* 20. How many residents have been presumed SARS-CoV-2 positive **without any testing?**

\* 21. Of these residents presumed SARS-CoV-2 positive **without any testing**, what specific week did they first exhibit symptoms? (Please write N/A if you don't this information)

Number manifesting  
symptoms (3/2-3/8)

Number manifesting  
symptoms (3/9-3/15)

Number manifesting  
symptoms (3/16-3/22)

Number manifesting  
symptoms (3/23-3/29)

Number manifesting  
symptoms (3/30-4/5)

Other

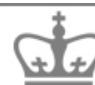

\* 22. How long were these presumed SARS-CoV-2 positive **without any testing** quarantined, if at all? (Please write N/A if you don't have this information)

Number of residents not  
quarantined at all

Number of residents  
quarantined 1-7 days

Number of residents  
quarantined 8-14 days

Number of residents  
quarantined 15-21 days

Number of residents  
quarantined >21 days

\* 23. Of these presumed SARS-CoV-2 positive **without any testing**, how many went to doctors (urgent care, PCP) for their symptoms? (Please write N/A if you don't have this information)

**For these next 5 questions, one resident may fall into multiple categories**

\* 24. Of these presumed SARS-CoV-2 positive **without any testing**, how many went to the emergency room for their symptoms?

\* 25. Of these presumed SARS-CoV-2 positive **without any testing**, how many were hospitalized for their symptoms?

\* 26. Of these presumed SARS-CoV-2 positive **without any testing**, how many were specifically admitted to the ICU or for critical management?

\* 27. Of these presumed SARS-CoV-2 positive **without any testing**, how many have died?

NYC COVID-19 Residency Survey

6.



\* 28. Do you have any residents who were highly suspicious for SARS-COV-2 (based on symptoms: sore throat, cough, fever, shortness of breath, chest pain, myalgias, malaise, conjunctivitis, loss of smell, GI symptoms) **but tested negative**?

☐ Yes

☐ No

## NYC COVID-19 Residency Survey

### 7. Residents Presumed SARS-CoV-2 Positive But **\*Tested Negative\***

\* 29. How many residents were/have been highly suspicious for SARS-CoV-2 infection but **tested negative** for SARS-CoV-2?

\* 30. Of these highly suspicious for SARS-CoV-2 infection but **tested negative**, what test was used?

☐ Nasal Swab

☐ Oropharyngeal Swab

☐ Bronchoalveolar Lavage

☐ Don't Know

Other (please specify)

\* 31. Of these highly suspicious for SARS-CoV-2 infection but **tested negative**, what specific week were they diagnosed or first to exhibit symptoms? (Please put N/A if you don't have this information)

Number manifesting  
symptoms (3/2-3/8)

Number manifesting  
symptoms (3/9-3/15)

Number manifesting  
symptoms (3/16-3/22)

Number manifesting  
symptoms (3/23-3/29)

Number manifesting  
symptoms (3/30-4/5)

N/A

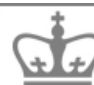

- \* 32. Of these highly suspicious for SARS-CoV-2 infection but **tested negative** residents, how long were they quarantined, if at all? (Please put N/A if you don't have this information)

Number of residents not  
quarantined at all

Number of residents  
quarantined 1-7 days

Number of residents  
quarantined 8-14 days

Number of residents  
quarantined 15-21 days

Number of residents  
quarantined >21 days

- \* 33. Of these highly suspicious for SARS-CoV-2 infection but **tested negative**, how many went to doctors (urgent care, PCP) for their symptoms?

**For these next 5 questions, one resident can fall into multiple categories**

- \* 34. Of these highly suspicious for SARS-CoV-2 infection but **tested negative**, how many went to the emergency room for their symptoms?

35. Of these highly suspicious for SARS-CoV-2 infection but **tested negative**, how many were hospitalized for their symptoms?

- \* 36. Of these highly suspicious for SARS-CoV-2 infection but **tested negative**, how many were specifically admitted to the ICU or for critical management?

- \* 37. Of these highly suspicious for SARS-CoV-2 infection but **tested negative**, how many have died?

NYC COVID-19 Residency Survey

8.



Columbia University IRB  
IRB-AAAS9946 (Y01M00)  
IRB Exemption Date: 04/02/2020



\* 38. Do you have any residents who have been quarantined due to exposure, but are asymptomatic?

- ☐ Yes
- ☐ No

## NYC COVID-19 Residency Survey

9.

\* 39. How many residents have been quarantined due to exposure, but are **asymptomatic**?

\* 40. For how long after exposure were **asymptomatic** residents quarantined?

- ☐ 1-7 days ☐ >21 days
- ☐ 8-14 days ☐ Duration varied between these residents
- ☐ 15-21 days

Other (please specify)

## NYC COVID-19 Residency Survey

10.

41. Have your residents been redeployed to other departments or units to help with COVID-19 management?

- ☐ Yes
- ☐ No

## NYC COVID-19 Residency Survey

11.

\* 42. How many of your residents have been redeployed to other departments or units to help with primary COVID-19 management efforts?



\* 43. What specific day did or will redeployment begin for your residents?

Redeployment Date

Date

MM/DD/YYYY

\* 44. Which units or departments have they been redeployed to, and how many to each? (Put N/A if you don't have this information)

Number of residents  
deployed to ER

Number of residents  
deployed to floor COVID

Number of residents  
deployed to ICU

Please specify the name of  
other departments  
residents have been  
deployed to (Optional 1)

Number of residents  
deployed to that  
department (Optional 1)

Please specify the name of  
other departments  
residents have been  
deployed to (Optional 2)

Number of residents  
deployed to that  
department (Optional 2)

\* 45. Are your residents offering visits via telemedicine now?

☐ Yes

☐ No

\* 46. Do you feel that your residents/fellows have had to work with suboptimal PPE?

☐ Yes

☐ No

NYC COVID-19 Residency Survey

12. Thank You!

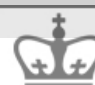

Columbia University IRB  
IRB-AAAS9946 (Y01M00)  
IRB Exemption Date: 04/02/2020

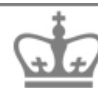

Supplement: Supplementary file [file 2020.04.23.20074310-1.pdf]
